# Supplementary material
Source: PubMed Central journal article supplement (PMC3807210)
Supplement: CVI.00162-13_zcd999094836so1.pdf [file CVI.00162-13_zcd999094836so1.pdf]

**Supplementary Table 1.** Summary of demographic characteristics by country (Total vaccinated cohort).

| <b>Characteristics</b> |                                              | <b>Panama</b> | <b>Thailand</b> | <b>Philippines</b> |
|------------------------|----------------------------------------------|---------------|-----------------|--------------------|
| <b>N</b>               |                                              | 390           | 390             | 390                |
| <b>Age</b>             | Mean (SD)                                    | 20.5 (1.94)   | 20.8 (1.92)     | 21.0 (2.28)        |
| <b>Sex</b>             | Female, n (%)                                | 205 (52.6)    | 230 (59.0)      | 191 (49.0)         |
|                        | Male, n (%)                                  | 185 (47.4)    | 160 (41.0)      | 199 (51.0)         |
| <b>Race</b>            | Asian – South-East Asian heritage, n (%)     | 0 (0.0)       | 386 (99.0)      | 388 (99.5)         |
|                        | Asian – East Asian heritage, n (%)           | 0 (0.0)       | 4 (1.0)         | 1 (0.3)            |
|                        | Asian – Central/South Asian heritage, n (%)  | 1 (0.3)       | 0 (0.0)         | 0 (0.0)            |
|                        | Asian – Japanese heritage, n (%)             | 0 (0.0)       | 0 (0.0)         | 1 (0.3)            |
|                        | African heritage/African American, n (%)     | 46 (11.8)     | 0 (0.0)         | 0 (0.0)            |
|                        | White – Caucasian/European heritage, n (%)   | 40 (10.3)     | 0 (0.0)         | 0 (0.0)            |
|                        | White – Arabic/North African heritage, n (%) | 1 (0.3)       | 0 (0.0)         | 0 (0.0)            |
|                        | Other*, n (%)                                | 302 (77.4)    | 0 (0.0)         | 0 (0.0)            |

Footnote:

N=number of subjects

n (%)=number (percentage) of subjects in a given category

SD=standard deviation

Other\*=Hispanic, Indigenous, Kuna (Indigenous), Latin, Mixed and Panamanian Lebanese
