# Supplementary material
Source: PubMed Central journal article supplement (PMC3807210)
Supplement: CVI.00162-13_zcd999094836so2.pdf [file CVI.00162-13_zcd999094836so2.pdf]

**Supplementary Table 2.** Percentage of subjects with rSBA titers  $\geq$  the cut-off values of 1:8 and 1:128 prior to and one month after vaccination, analysis by country, GlaxoSmithKline rSBA assay (ATP cohort for immunogenicity).

| GSK rSBA titers  |      |        |                       |                         |          |                       |                         |             |                       |                         |
|------------------|------|--------|-----------------------|-------------------------|----------|-----------------------|-------------------------|-------------|-----------------------|-------------------------|
| Group            | Tp   | Panama |                       |                         | Thailand |                       |                         | Philippines |                       |                         |
|                  |      | N      | % $\geq$ 1:8 (95% CI) | % $\geq$ 1:128 (95% CI) | N        | % $\geq$ 1:8 (95% CI) | % $\geq$ 1:128 (95% CI) | N           | % $\geq$ 1:8 (95% CI) | % $\geq$ 1:128 (95% CI) |
| <b>rSBA-MenA</b> |      |        |                       |                         |          |                       |                         |             |                       |                         |
| <b>ACWY-A</b>    | Pre  | 110    | 90.0 (82.8, 94.9)     | 86.4 (78.5, 92.2)       | 104      | 95.2 (89.1, 98.4)     | 89.4 (81.9, 94.6)       | 106         | 92.5 (85.7, 96.7)     | 79.2 (70.3, 86.5)       |
|                  | Post | 114    | 100 (96.8, 100)       | 100 (96.8, 100)         | 117      | 100 (96.9, 100)       | 100 (96.9, 100)         | 128         | 100 (97.2, 100)       | 100 (97.2, 100)         |
| <b>ACWY-B</b>    | Pre  | 112    | 92.9 (86.4, 96.9)     | 88.4 (81.0, 93.7)       | 112      | 98.2 (93.7, 99.8)     | 92.9 (86.4, 96.9)       | 104         | 96.2 (90.4, 98.9)     | 85.6 (77.3, 91.7)       |
|                  | Post | 107    | 100 (96.6, 100)       | 100 (96.6, 100)         | 118      | 100 (96.9, 100)       | 100 (96.9, 100)         | 118         | 100 (96.9, 100)       | 100 (96.9, 100)         |
| <b>Men-PS</b>    | Pre  | 108    | 97.2 (92.1, 99.4)     | 95.4 (89.5, 98.5)       | 98       | 94.9 (88.5, 98.3)     | 85.7 (77.2, 92.0)       | 104         | 93.3 (86.6, 97.3)     | 84.6 (76.2, 90.9)       |
|                  | Post | 112    | 100 (96.8, 100)       | 100 (96.8, 100)         | 121      | 100 (97.0, 100)       | 100 (97.0, 100)         | 123         | 100 (97.0, 100)       | 100 (97.0, 100)         |
| <b>rSBA-MenC</b> |      |        |                       |                         |          |                       |                         |             |                       |                         |
| <b>ACWY-A</b>    | Pre  | 110    | 43.6 (34.2, 53.4)     | 30.9 (22.4, 40.4)       | 126      | 61.1 (52.0, 69.7)     | 36.5 (28.1, 45.6)       | 115         | 74.8 (65.8, 82.4)     | 46.1 (36.8, 55.6)       |
|                  | Post | 115    | 100 (96.8, 100)       | 100 (96.8, 100)         | 129      | 100 (97.2, 100)       | 100 (97.2, 100)         | 130         | 100 (97.2, 100)       | 100 (97.2, 100)         |
| <b>ACWY-B</b>    | Pre  | 113    | 47.8 (38.3, 57.4)     | 31.9 (23.4, 41.3)       | 125      | 64.8 (55.8, 73.1)     | 42.4 (33.6, 51.6)       | 112         | 69.6 (60.2, 78.0)     | 54.5 (44.8, 63.9)       |
|                  | Post | 112    | 100 (96.8, 100)       | 100 (96.8, 100)         | 129      | 100 (97.2, 100)       | 100 (97.2, 100)         | 129         | 100 (97.2, 100)       | 100 (97.2, 100)         |

|                      |      |     |                   |                   |     |                   |                   |     |                   |                   |
|----------------------|------|-----|-------------------|-------------------|-----|-------------------|-------------------|-----|-------------------|-------------------|
| <b>Men-PS</b>        | Pre  | 119 | 41.2 (32.2, 50.6) | 31.1 (22.9, 40.2) | 127 | 67.7 (58.8, 75.7) | 50.4 (41.4, 59.4) | 115 | 77.4 (68.7, 84.7) | 50.4 (41.0, 59.9) |
|                      | Post | 114 | 100 (96.8, 100)   | 99.1 (95.2, 100)  | 128 | 100 (97.2, 100)   | 100 (97.2, 100)   | 130 | 100 (97.2, 100)   | 99.2 (95.8, 100)  |
| <b>rSBA-MenW-135</b> |      |     |                   |                   |     |                   |                   |     |                   |                   |
| <b>ACWY-A</b>        | Pre  | 114 | 76.3 (67.4, 83.8) | 60.5 (50.9, 69.6) | 123 | 89.4 (82.6, 94.3) | 76.4 (67.9, 83.6) | 106 | 93.4 (86.9, 97.3) | 76.4 (67.2, 84.1) |
|                      | Post | 116 | 100 (96.9, 100)   | 100 (96.9, 100)   | 129 | 100 (97.2, 100)   | 100 (97.2, 100)   | 130 | 100 (97.2, 100)   | 100 (97.2, 100)   |
| <b>ACWY-B</b>        | Pre  | 107 | 86.9 (79.0, 92.7) | 71.0 (61.5, 79.4) | 119 | 82.4 (74.3, 88.7) | 76.5 (67.8, 83.8) | 107 | 88.8 (81.2, 94.1) | 68.2 (58.5, 76.9) |
|                      | Post | 113 | 100 (96.8, 100)   | 100 (96.8, 100)   | 129 | 100 (97.2, 100)   | 100 (97.2, 100)   | 128 | 100 (97.2, 100)   | 100 (97.2, 100)   |
| <b>Men-PS</b>        | Pre  | 116 | 84.5 (76.6, 90.5) | 75.0 (66.1, 82.6) | 122 | 82.8 (74.9, 89.0) | 68.9 (59.8, 76.9) | 107 | 92.5 (85.8, 96.7) | 68.2 (58.5, 76.9) |
|                      | Post | 114 | 100 (96.8, 100)   | 100 (96.8, 100)   | 128 | 100 (97.2, 100)   | 100 (97.2, 100)   | 130 | 100 (97.2, 100)   | 99.2 (95.8, 100)  |
| <b>rSBA-MenY</b>     |      |     |                   |                   |     |                   |                   |     |                   |                   |
| <b>ACWY-A</b>        | Pre  | 119 | 86.6 (79.1, 92.1) | 78.2 (69.6, 85.2) | 129 | 93.8 (88.1, 93.7) | 83.7 (76.2, 89.6) | 115 | 96.5 (91.3, 99.0) | 92.2 (85.7, 96.4) |
|                      | Post | 116 | 100 (96.9, 100)   | 100 (96.9, 100)   | 129 | 100 (97.2, 100)   | 100 (97.2, 100)   | 130 | 100 (97.2, 100)   | 100 (97.2, 100)   |
| <b>ACWY-B</b>        | Pre  | 115 | 89.6 (82.5, 94.5) | 80.0 (71.5, 86.9) | 128 | 94.5 (89.1, 97.8) | 86.7 (79.6, 92.1) | 116 | 98.3 (93.9, 99.8) | 90.5 (83.7, 95.2) |
|                      | Post | 113 | 100 (96.8, 100)   | 100 (96.8, 100)   | 129 | 100 (97.2, 100)   | 100 (97.2, 100)   | 129 | 100 (97.2, 100)   | 100 (97.2, 100)   |
| <b>Men-PS</b>        | Pre  | 120 | 88.3 (81.2, 93.5) | 82.5 (74.5, 88.8) | 128 | 94.5 (89.1, 97.8) | 88.3 (81.4, 93.3) | 116 | 94.0 (88.0, 97.5) | 87.1 (79.6, 92.6) |
|                      | Post | 115 | 100 (96.8, 100)   | 100 (96.8, 100)   | 128 | 100 (97.2, 100)   | 100 (97.2, 100)   | 130 | 100 (97.2, 100)   | 100 (97.2, 100)   |

Footnote: ACWY-A=subjects vaccinated with MenACWY-TT Lot A

ACWY-B=subjects vaccinated with MenACWY-TT Lot B

Men-PS=subjects vaccinated with Men-PS

GSK=GlaxoSmithKline

Tp=timepoint

N=number of subjects with available results

%=percentage of subjects with titer within the specified range

95% CI=95% confidence interval

Pre=pre-vaccination at month 0

Post=post-vaccination at month 1
